# Supplementary material for: Contamination Status and Acute Dietary Exposure Assessment of Paralytic Shellfish Toxins in Shellfish in the Dalian Area of the Yellow-Bohai Sea, China
Source: MDPI journal article supplement (doi:10.3390/foods13030361), 2024-01-23
Supplement: s1 [file s1]

**Table S1** Uncertainty analysis of acute dietary exposure to PST from shellfish in general consumers

| Age groups | Statistics | P2.5  | P25   | P50   | P75   | P97.5 | QR    | 95%CI          |
|------------|------------|-------|-------|-------|-------|-------|-------|----------------|
| 3~6        | Mean       | 0.436 | 0.447 | 0.451 | 0.458 | 0.467 | 0.011 | (0.436, 0.467) |
|            | P50        | 0.239 | 0.244 | 0.247 | 0.248 | 0.254 | 0.005 | (0.239, 0.254) |
|            | P75        | 0.527 | 0.534 | 0.542 | 0.548 | 0.560 | 0.014 | (0.527, 0.560) |
|            | P90        | 0.989 | 1.021 | 1.034 | 1.050 | 1.069 | 0.028 | (0.989, 1.069) |
|            | P95        | 1.425 | 1.494 | 1.545 | 1.562 | 1.616 | 0.069 | (1.425, 1.616) |
|            | P97.5      | 2.011 | 2.094 | 2.156 | 2.192 | 2.365 | 0.098 | (2.011, 2.365) |
|            | P99        | 2.781 | 3.010 | 3.090 | 3.221 | 3.438 | 0.211 | (2.781, 3.438) |
|            | P99.9      | 4.974 | 6.377 | 6.726 | 7.080 | 8.625 | 0.702 | (4.974, 8.625) |
| 7~12       | Mean       | 0.375 | 0.383 | 0.386 | 0.389 | 0.394 | 0.006 | (0.375, 0.394) |
|            | P50        | 0.219 | 0.222 | 0.224 | 0.225 | 0.231 | 0.003 | (0.219, 0.231) |
|            | P75        | 0.451 | 0.458 | 0.464 | 0.467 | 0.475 | 0.010 | (0.451, 0.475) |
|            | P90        | 0.828 | 0.849 | 0.860 | 0.868 | 0.882 | 0.019 | (0.828, 0.882) |
|            | P95        | 1.214 | 1.242 | 1.274 | 1.295 | 1.325 | 0.054 | (1.214, 1.325) |
|            | P97.5      | 1.635 | 1.726 | 1.762 | 1.794 | 1.924 | 0.068 | (1.635, 1.924) |
|            | P99        | 2.300 | 2.537 | 2.587 | 2.659 | 2.831 | 0.122 | (2.300, 2.831) |
|            | P99.9      | 4.312 | 4.790 | 5.074 | 5.629 | 6.162 | 0.838 | (4.312, 6.162) |
| 13~18      | Mean       | 0.278 | 0.283 | 0.287 | 0.290 | 0.298 | 0.007 | (0.278, 0.298) |
|            | P50        | 0.166 | 0.170 | 0.172 | 0.174 | 0.177 | 0.004 | (0.166, 0.177) |
|            | P75        | 0.339 | 0.347 | 0.353 | 0.360 | 0.367 | 0.013 | (0.339, 0.367) |
|            | P90        | 0.611 | 0.631 | 0.642 | 0.651 | 0.668 | 0.020 | (0.611, 0.668) |
|            | P95        | 0.879 | 0.903 | 0.918 | 0.941 | 0.989 | 0.038 | (0.879, 0.989) |
|            | P97.5      | 1.195 | 1.229 | 1.274 | 1.312 | 1.381 | 0.083 | (1.195, 1.381) |
|            | P99        | 1.566 | 1.765 | 1.837 | 1.891 | 2.044 | 0.126 | (1.566, 2.044) |
|            | P99.9      | 2.800 | 3.249 | 3.423 | 3.924 | 4.438 | 0.674 | (2.800, 4.438) |
| 19~59      | Mean       | 0.240 | 0.241 | 0.242 | 0.242 | 0.244 | 0.001 | (0.240, 0.244) |
|            | P50        | 0.137 | 0.138 | 0.138 | 0.139 | 0.139 | 0.001 | (0.137, 0.139) |
|            | P75        | 0.284 | 0.285 | 0.287 | 0.288 | 0.290 | 0.002 | (0.284, 0.290) |
|            | P90        | 0.535 | 0.538 | 0.540 | 0.541 | 0.545 | 0.003 | (0.535, 0.545) |
|            | P95        | 0.779 | 0.789 | 0.793 | 0.795 | 0.805 | 0.006 | (0.779, 0.805) |
|            | P97.5      | 1.094 | 1.108 | 1.116 | 1.122 | 1.139 | 0.014 | (1.094, 1.139) |
|            | P99        | 1.602 | 1.625 | 1.642 | 1.677 | 1.726 | 0.053 | (1.602, 1.726) |
|            | P99.9      | 3.275 | 3.434 | 3.520 | 3.613 | 3.750 | 0.180 | (3.275, 3.750) |
| ≥60        | Mean       | 0.210 | 0.213 | 0.215 | 0.216 | 0.218 | 0.003 | (0.210, 0.218) |
|            | P50        | 0.123 | 0.124 | 0.125 | 0.126 | 0.127 | 0.002 | (0.123, 0.127) |
|            | P75        | 0.254 | 0.257 | 0.260 | 0.261 | 0.265 | 0.004 | (0.254, 0.265) |
|            | P90        | 0.468 | 0.474 | 0.478 | 0.482 | 0.490 | 0.008 | (0.468, 0.490) |
|            | P95        | 0.667 | 0.687 | 0.696 | 0.704 | 0.716 | 0.018 | (0.667, 0.716) |
|            | P97.5      | 0.900 | 0.930 | 0.937 | 0.957 | 0.989 | 0.027 | (0.900, 0.989) |
|            | P99        | 1.288 | 1.394 | 1.432 | 1.453 | 1.528 | 0.059 | (1.288, 1.528) |
|            | P99.9      | 2.642 | 2.885 | 3.024 | 3.148 | 3.392 | 0.263 | (2.642, 3.392) |
| Total      | Mean       | 0.262 | 0.263 | 0.264 | 0.265 | 0.266 | 0.001 | (0.262, 0.266) |
|            | P50        | 0.146 | 0.147 | 0.148 | 0.148 | 0.149 | 0.001 | (0.146, 0.149) |
|            | P75        | 0.308 | 0.309 | 0.310 | 0.311 | 0.313 | 0.002 | (0.308, 0.313) |

---

|       |       |       |       |       |       |       |                |
|-------|-------|-------|-------|-------|-------|-------|----------------|
| P90   | 0.589 | 0.592 | 0.594 | 0.595 | 0.599 | 0.003 | (0.589, 0.599) |
| P95   | 0.866 | 0.869 | 0.873 | 0.878 | 0.885 | 0.009 | (0.866, 0.885) |
| P97.5 | 1.218 | 1.232 | 1.238 | 1.248 | 1.261 | 0.016 | (1.218, 1.261) |
| P99   | 1.802 | 1.835 | 1.855 | 1.869 | 1.922 | 0.034 | (1.802, 1.922) |
| P99.9 | 3.725 | 3.850 | 3.919 | 3.965 | 4.134 | 0.114 | (3.725, 4.134) |

---
